# Supplementary material
Source: MDPI journal article supplement (https://www.mdpi.com/2073-4344/13/2/372)
Supplement: s1 [file s1]

# Supplementary Material

## Performance of particulate and structured Pt/TiO<sub>2</sub>-based catalysts for the WGS reaction under realistic high- and low-temperature shift conditions

Andreas Kouroumlidis<sup>1</sup>, Georgios Bamos<sup>1,\*</sup>, Paraskevi Panagiotopoulou<sup>2</sup> and Dimitris I. Kondarides<sup>1</sup>

<sup>1</sup> Department of Chemical Engineering, University of Patras, GR-26504, Patras, Greece; andreas\_kourou@yahoo.gr (A.K.); geo-ba@chemeng.upatras.gr (G.B.); dimi@chemeng.upatras.gr (D.I.K.)

<sup>2</sup> School of Environmental Engineering, Technical University of Crete, GR-73100, Chania, Greece; ppanagiotopoulou@isc.tuc.gr (P.P.)

\* Correspondence: geoba@chemeng.upatras.gr; Tel.: +30 2610997223

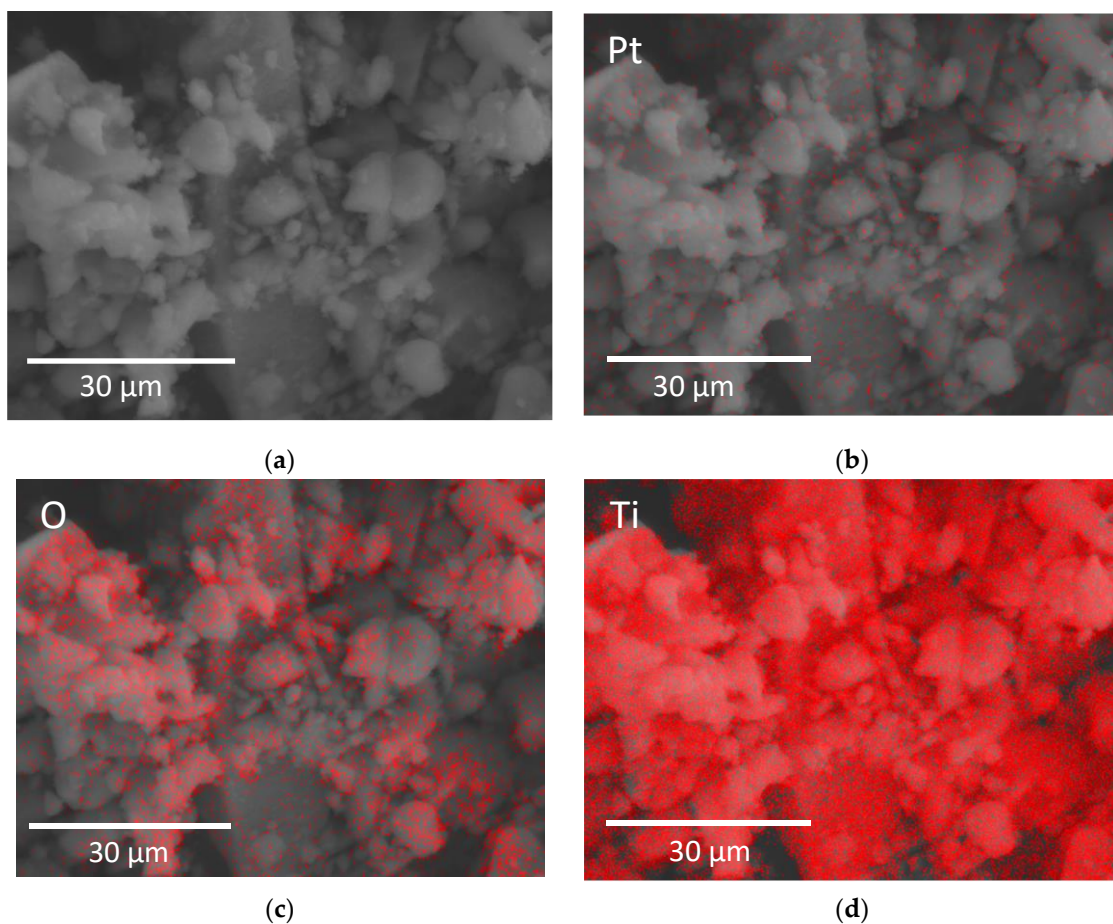

**Figure S1.** (a) SEM image of the as prepared Pt/TiO<sub>2</sub> catalyst, and EDS mapping results showing the distribution of (b) Pt, (c) O and (d) Ti elements.

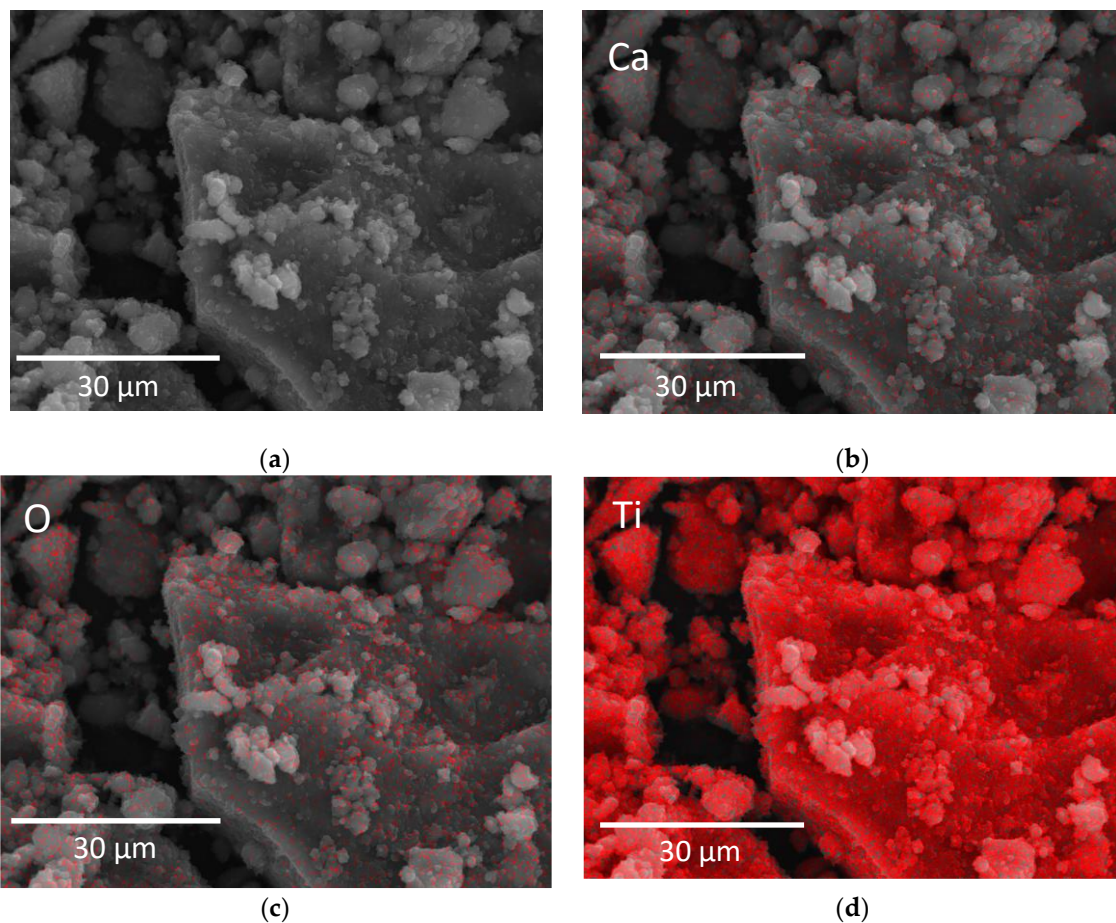

**Figure S2.** (a) SEM image of the as prepared  $\text{TiO}_2(\text{Ca})$  support, and EDS mapping results showing the distribution of (b) Ca, (c) O and (d) Ti elements.

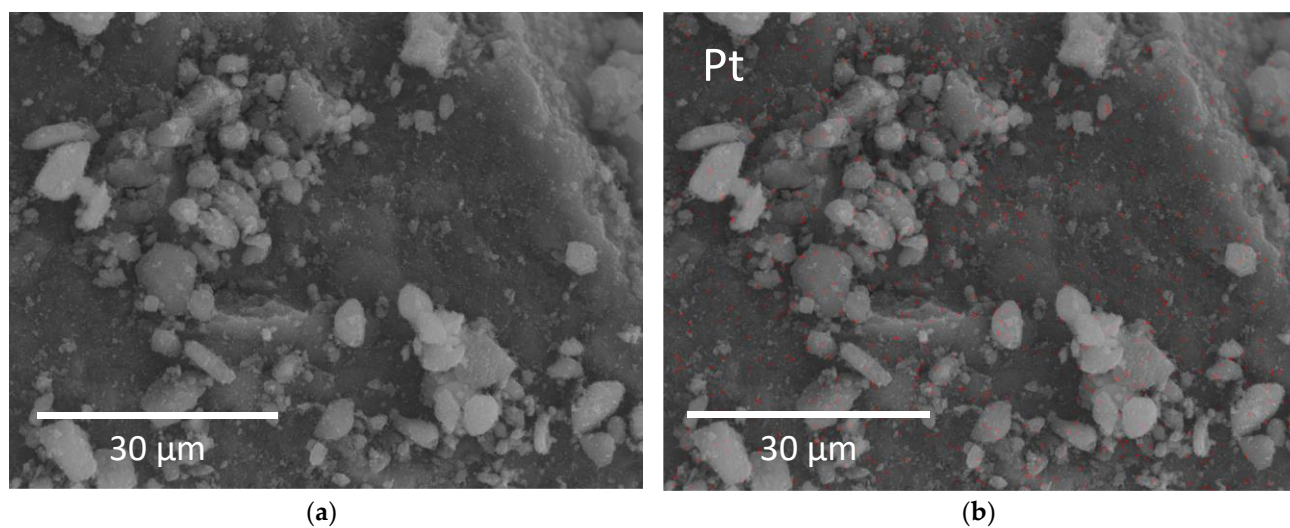

**Figure S3.** (a) SEM image of the  $\text{Pt}/\text{TiO}_2(\text{Ca})$  catalyst and (b) EDS mapping results showing the distribution of Pt element.

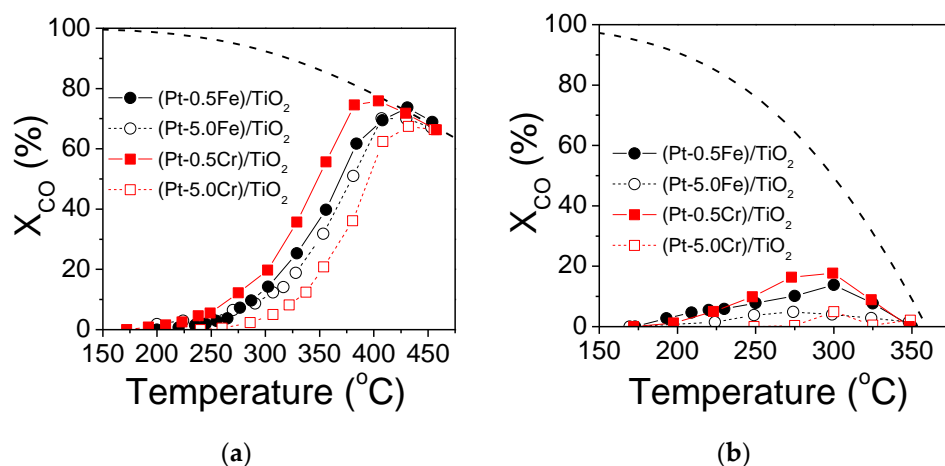

**Figure S4.** Effects of the metal content on the performance of bimetallic (0.5%Pt- $x$ %M)/TiO<sub>2</sub> catalysts ( $x=0.5$  or 5.0; M=Fe or Cr) under (A) HTS and (B) LTS conditions. Experimental conditions same as in Figure 3.

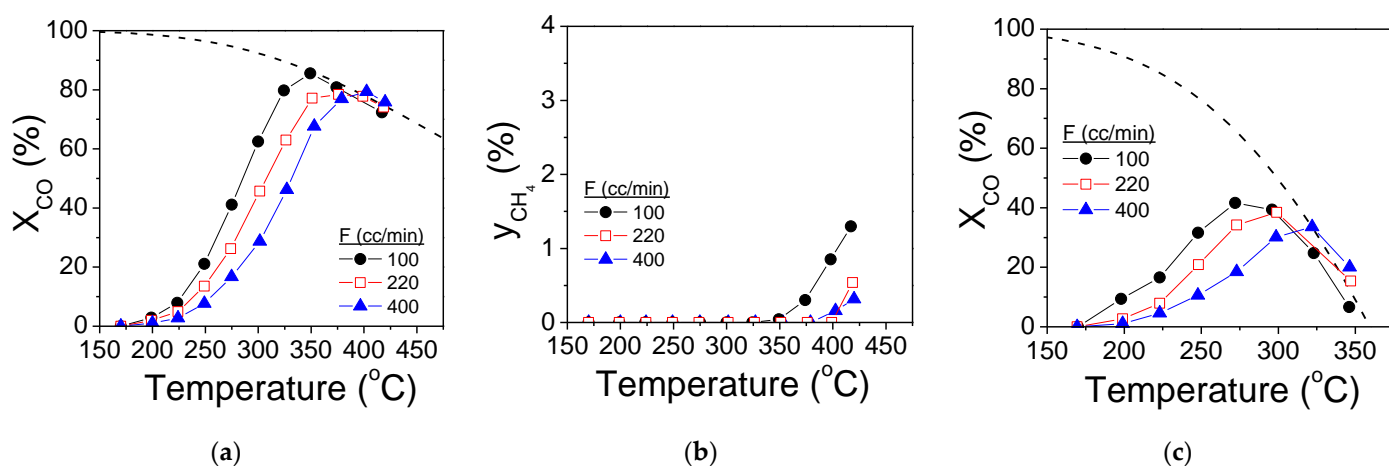

**Figure S5.** Effects of total flow rate on the performance of Pt/TiO<sub>2</sub>(Ca) catalysts coated on the channels of the ceramic monolith: (A) Conversion of CO and (B) yield of CH<sub>4</sub> under HTS conditions. (C) Conversion of CO under LTS conditions. Other experimental conditions same as in Figure 5.

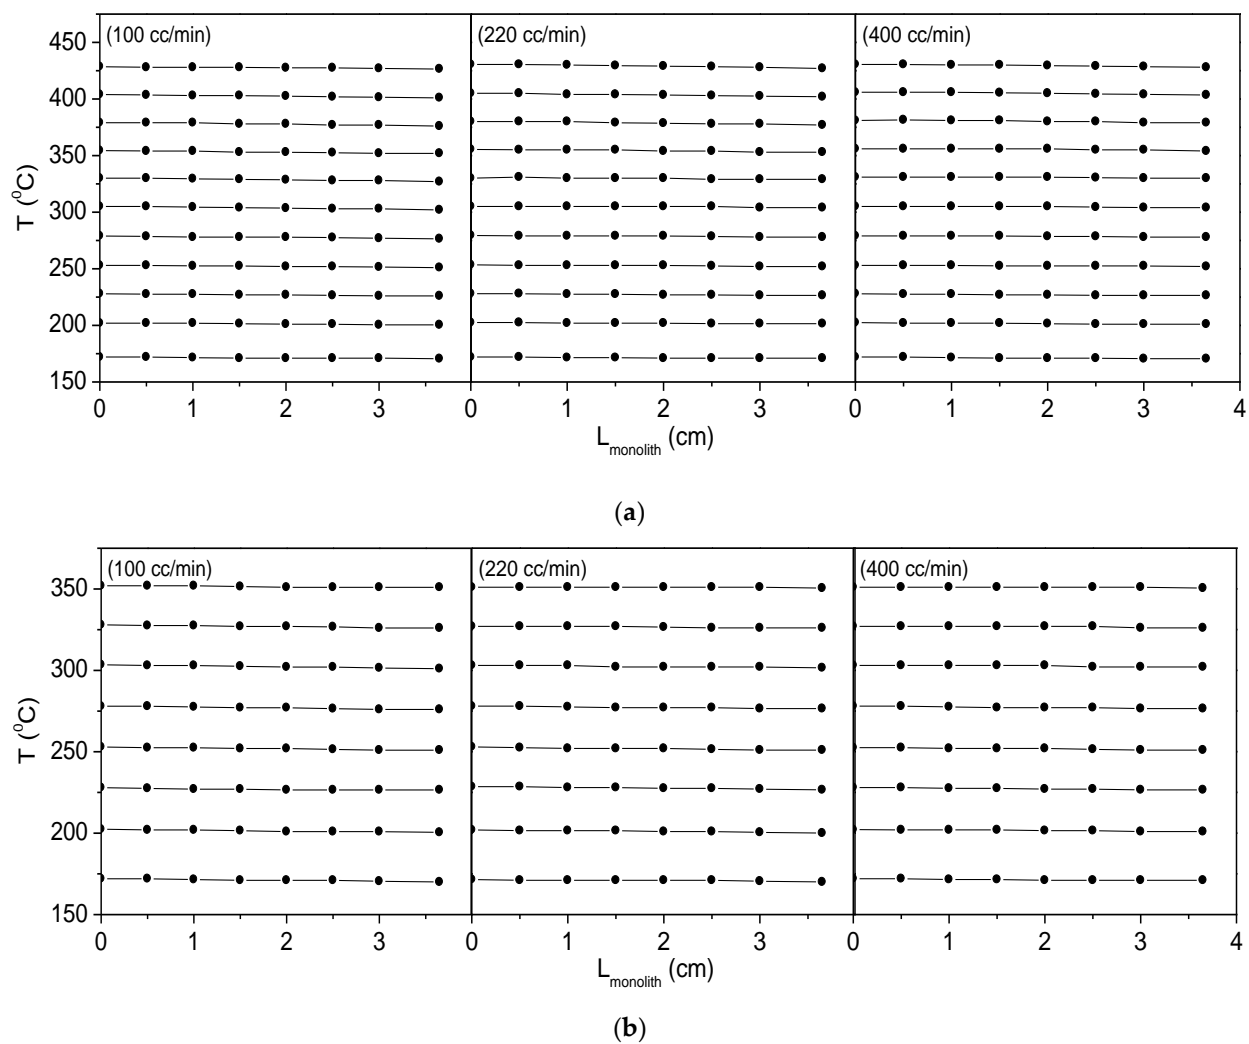

**Figure S6.** Temperature profile along the Pt/TiO<sub>2</sub>(Ca)-coated metallic monolith (inlet at  $L=0$ ) at the indicated total flow rates under the (a) HTS and (b) LTS reaction conditions shown in Figure 6.

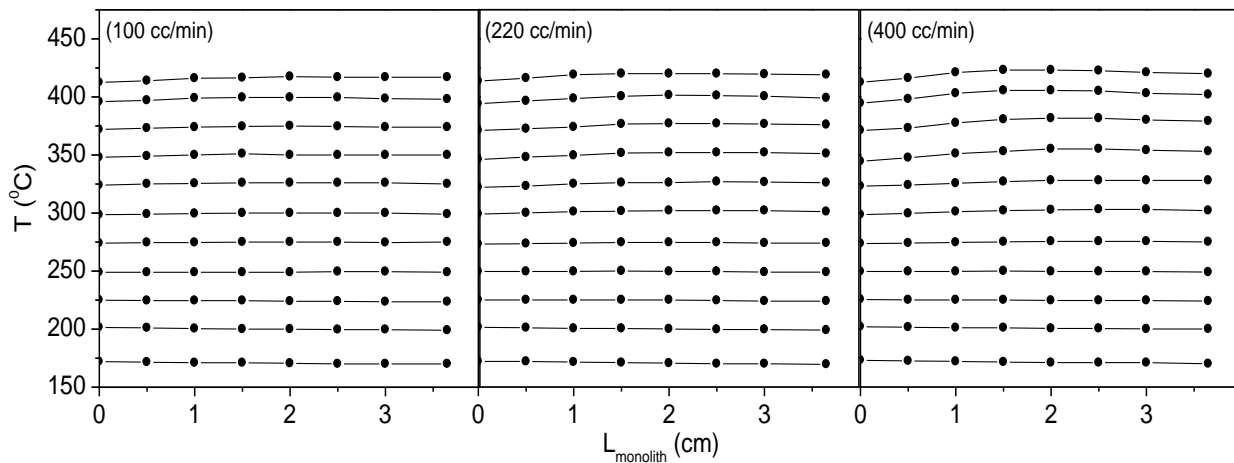

(a)

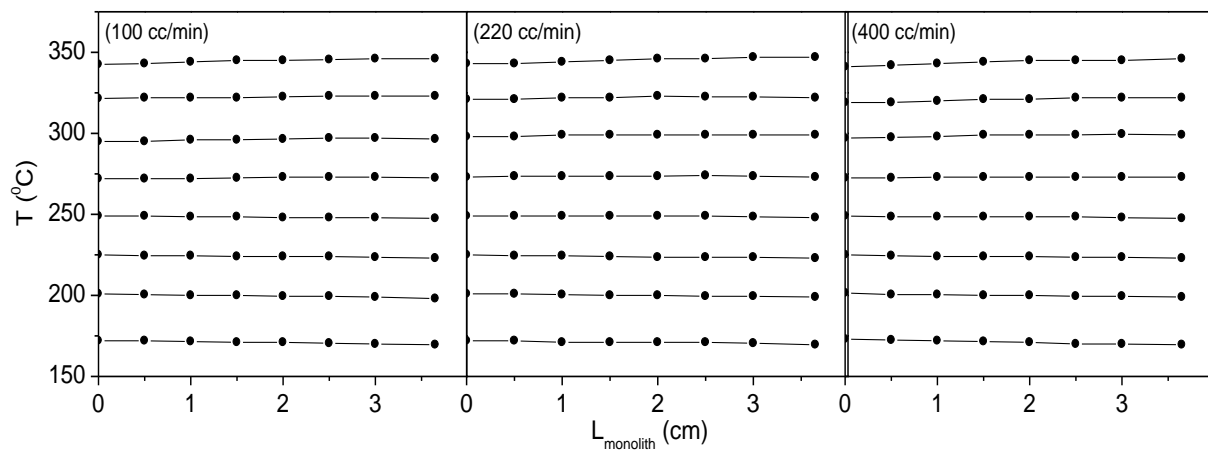

(b)

**Figure S7.** Temperature profile along the Pt/TiO<sub>2</sub>(Ca)-coated ceramic monolith (inlet at  $L=0$ ) at the indicated total flow rates under the (a) HTS and (b) LTS reaction conditions shown in Figure 6.
